# Supplementary material
Source: Springer Nature journal article supplement (https://www.springermedizin.de/resource/supplementary/12885_2013_4204_MOESM8_ESM.pdf/9465756)
Supplement: MOESM8 [file 9465756]

**A**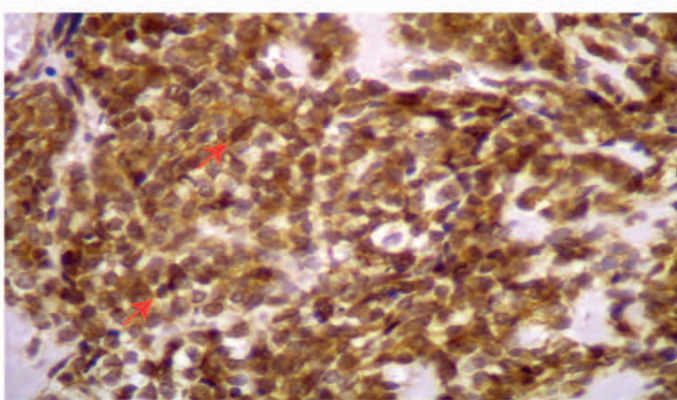**B**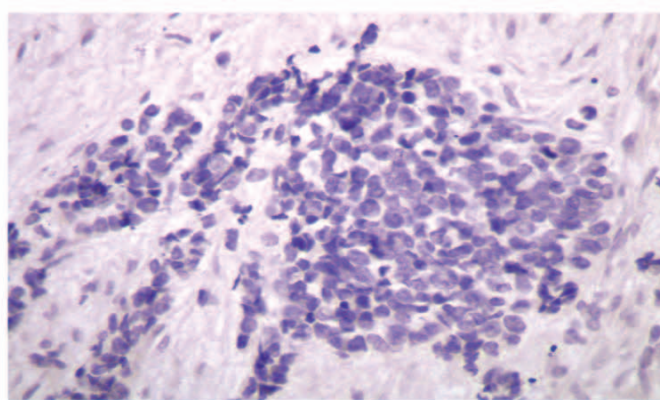

Control (Secondary Only)

**C**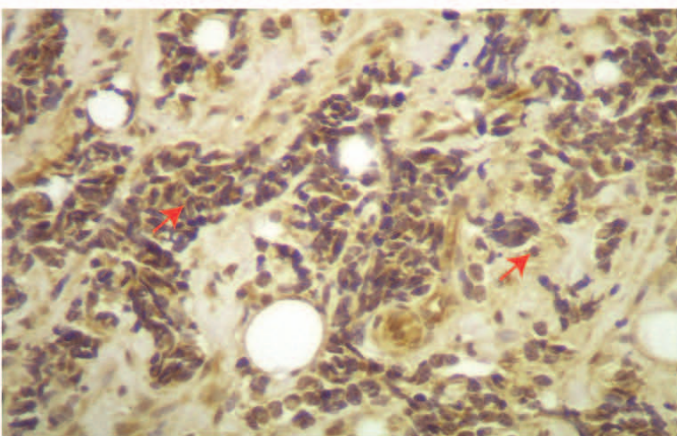**E**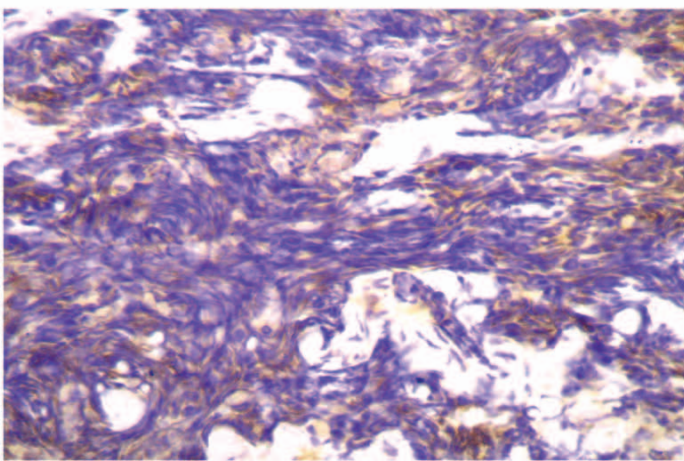**D**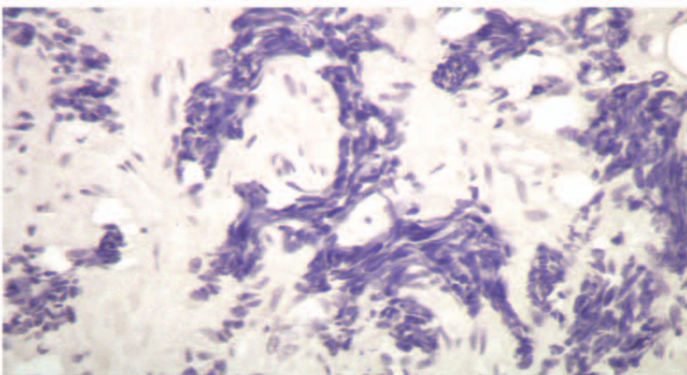

Control (Secondary Only)
